# Supplementary material for: A Review of Registered Randomized Controlled Trials for the Prevention of Obesity in Infancy
Source: MDPI journal article supplement (doi:10.3390/ijerph18052444), 2021-03-02
Supplement: s1 [file s1]

## Supplementary files

**Table S1.** Characteristics of early intervention studies for the prevention of obesity in infancy (N=29).

| Ref no              |                    |                              |           |              |                           |                           |                         |                                                      |                                                                                         |                                                                    |                                                                                                                                                                                                                                                                                             |                                                                                                          |
|---------------------|--------------------|------------------------------|-----------|--------------|---------------------------|---------------------------|-------------------------|------------------------------------------------------|-----------------------------------------------------------------------------------------|--------------------------------------------------------------------|---------------------------------------------------------------------------------------------------------------------------------------------------------------------------------------------------------------------------------------------------------------------------------------------|----------------------------------------------------------------------------------------------------------|
| Registration No     | Trial Name/Acronym | Author , Year (if published) | Country   | Study design | Number randomized         | Intervention commencement | Duration of follow up   | Primary outcome(s)                                   | Secondary outcome (s)                                                                   | Delivery mode                                                      | Intervention components                                                                                                                                                                                                                                                                     | Controls                                                                                                 |
| ACTRN12607000168459 | Healthy Beginnings | Wen 2012<br><br>Wen 2015     | Australia | RCT          | N=667 mother-child dyads  | Antenatal                 | Birth until 5 years     | Child BMI z score at child age 2 and 5 years         | Infant feeding practices, TV viewing time, active play time, mothers dietary behaviours | Nurse home visits                                                  | The nurse visited eight times at home, once at 30-36 weeks' gestation and seven times after the birth (at 1, 3, 5, 9, 12, 18 and 24 months). Four key areas included infant feeding practices, child nutrition and active play, family physical activity and nutrition, and social support. | Usual care: 1x Community Health nurse home visit plus home safety promotion materials at 6 and 12months. |
| 2. ISRCTN81847050   | InFANT             | Campbell 2013                | Australia | Cluster RCT  | N= 542 parent-child dyads | Mean 3.8 months           | Child age 4months until | Child diet (3x 24 hour diet recalls), child physical | BMI z scores                                                                            | Sessions with dietitian in pre-existing mothers groups, supportive | Six 2 hour sessions of education delivered by dietitian targeting                                                                                                                                                                                                                           | Usual care with Maternal and Child Health nurse plus                                                     |

|       |                     |         |                                  |           |     |                          |                                                               |                                  |                                                   |                                                                                                                                                                                                                                                                                                                                  |                                                                          |                                                                                                                                                                                     |                                                      |
|-------|---------------------|---------|----------------------------------|-----------|-----|--------------------------|---------------------------------------------------------------|----------------------------------|---------------------------------------------------|----------------------------------------------------------------------------------------------------------------------------------------------------------------------------------------------------------------------------------------------------------------------------------------------------------------------------------|--------------------------------------------------------------------------|-------------------------------------------------------------------------------------------------------------------------------------------------------------------------------------|------------------------------------------------------|
|       |                     |         |                                  |           |     | 20 months                | activity (accelerometry) and child TV viewing (parent report) |                                  | materials (DVD, written materials and newsletter) | nutrition, physical activity and sedentary behaviours occurred within pre-existing mothers groups, commencing at 3 months at 3monthly intervals (3, 6, 9, 12, 15 and 18 months). Didactic sessions, group discussion and peer support. Reinforced by purpose designed DVD and written materials plus newsletter between sessions | 6 newsletters regarding unrelated aspects of child health or development |                                                                                                                                                                                     |                                                      |
| <hr/> |                     |         |                                  |           |     |                          |                                                               |                                  |                                                   |                                                                                                                                                                                                                                                                                                                                  |                                                                          |                                                                                                                                                                                     |                                                      |
| 3.    | ACTRN12608000056392 | NOURISH | Daniels 2013<br><br>Daniels 2015 | Australia | RCT | N=698 mother-child dyads | Child age 4 months                                            | Child age 4 months until 5 years | BMI z score at 24months and 5 years               | Maternal feeding practices                                                                                                                                                                                                                                                                                                       | Educational group sessions in supported by detailed written information  | Two educational group session modules (6 fortnightly sessions each) commencing at infant age 4-7months and again at 13-16months supported by detailed written information regarding | Usual care: standard community child health services |







|    |             |            |         |     |     |                            |                   |                              |                |                                                                          |                                                                                                             |                                                                                                                                                                                                                                                                                                                                                               |                                                                 |  |  |  |  |                                                                                                               |
|----|-------------|------------|---------|-----|-----|----------------------------|-------------------|------------------------------|----------------|--------------------------------------------------------------------------|-------------------------------------------------------------------------------------------------------------|---------------------------------------------------------------------------------------------------------------------------------------------------------------------------------------------------------------------------------------------------------------------------------------------------------------------------------------------------------------|-----------------------------------------------------------------|--|--|--|--|---------------------------------------------------------------------------------------------------------------|
|    |             |            |         |     |     |                            |                   |                              |                |                                                                          |                                                                                                             |                                                                                                                                                                                                                                                                                                                                                               |                                                                 |  |  |  |  | family characteristics and health-related behaviours when child 1month, 6months, 14months and 36months of age |
| 7. | NCT01040897 | GREENLIGHT | Sanders | USA | RCT | N= 865 parent-infant dyads | Child age 2months | Child age 5months to 2 years | BMI at 2 years | Child dietary intake, physical activity and injury prevention behaviours | Tool kit with written information, routine reviews with trained Paediatric resident in primary care clinics | Low-literacy toolkit for parents, a health-communication curriculum for child-health providers, including modules on goal-setting techniques, educational toolkit, a clinician-centred curriculum for providing low-literacy guidance on obesity prevention. Behaviour-change components administered by Paediatric residents at each well-child visit from 2 | Usual care: plus, injury prevention program (attention placebo) |  |  |  |  |                                                                                                               |

|    |             |                                                                      |                                                  |     |     |                                      |                     |                                |                                                                 |                                                                                                                                                       |                                                                                                                  |                                                                                                                                                                                                                                                                                                                                     |                                                                                                 |
|----|-------------|----------------------------------------------------------------------|--------------------------------------------------|-----|-----|--------------------------------------|---------------------|--------------------------------|-----------------------------------------------------------------|-------------------------------------------------------------------------------------------------------------------------------------------------------|------------------------------------------------------------------------------------------------------------------|-------------------------------------------------------------------------------------------------------------------------------------------------------------------------------------------------------------------------------------------------------------------------------------------------------------------------------------|-------------------------------------------------------------------------------------------------|
|    |             |                                                                      |                                                  |     |     |                                      |                     |                                |                                                                 |                                                                                                                                                       |                                                                                                                  | months to 24 months.                                                                                                                                                                                                                                                                                                                |                                                                                                 |
| 8. | NCT03370445 | Addressing Health Literacy and Numeracy to Prevent Childhood Obesity | Cruzatt                                          | USA | RCT | N= 450 parent-child dyads (estimate) | Child age 2 months  | Child age 2 months to 5 years  | Proportion of children at 24 months who are not overnight (BMI) | Weight status of children at 5 years of age (BMI z score)                                                                                             | 'Tool kit' with written information, routine reviews with trained Paediatric resident in primary care clinics    | Interaction with Paediatric resident physicians who are trained in improved health communication skills. Also provided with low literacy handouts and study-related 'gifts' to assess nutrition and physical activity behaviours and reinforce evidence based recommendations about early childhood nutrition and physical activity | Usual care: plus injury prevention program (attention placebo)                                  |
| 9. | NCT01167270 | INSIGHT                                                              | Savage 2016<br><br>Adams 2018<br><br>Savage 2018 | USA | RCT | N= 279 mother-child dyads            | Child age 1-2 weeks | Child age 1-2 weeks to 3 years | BMI at 3 years                                                  | Patterns of infant weight gain, infant sleep duration, maternal responsiveness, maternal feeding style, infant dietary content and physical activity. | Mailed educational visits, trained nurse home visits, research centre visits and phone calls to deliver messages | At 2 weeks post-partum, intervention materials were mailed to the participant's home. Research nurses conducted home visits at 3, 16, 28, and 40 weeks, and a research centre                                                                                                                                                       | Usual care: Routine care plus trained research nurse home visits, research centre visits, phone |





|    |                     |                                           |          |           |             |                           |                                                            |                                                                                                               |                                                                                                                                        |                                                                                                                                              |                                                                                                                                                      |                                                                                                                                 |
|----|---------------------|-------------------------------------------|----------|-----------|-------------|---------------------------|------------------------------------------------------------|---------------------------------------------------------------------------------------------------------------|----------------------------------------------------------------------------------------------------------------------------------------|----------------------------------------------------------------------------------------------------------------------------------------------|------------------------------------------------------------------------------------------------------------------------------------------------------|---------------------------------------------------------------------------------------------------------------------------------|
|    |                     |                                           |          |           |             |                           |                                                            |                                                                                                               |                                                                                                                                        |                                                                                                                                              | first year and twice a year after which takes place in the family's home, or at the clinic.                                                          |                                                                                                                                 |
|    |                     |                                           |          |           |             |                           |                                                            |                                                                                                               |                                                                                                                                        |                                                                                                                                              | Melbourne InFANT Program                                                                                                                             |                                                                                                                                 |
|    |                     |                                           |          |           |             |                           |                                                            |                                                                                                               |                                                                                                                                        |                                                                                                                                              | content will be delivered via six emailed newsletters (3 monthly from child age 18 months to 3 years)                                                | Usual care: Routine care in Maternal and Child Health Centres plus general health newsletters ever three months for three years |
| 11 | ACTRN12611000386932 | INFAnt Extend                             | Campbell | Australia | Cluster RCT | N= 540 mother-child dyads | Child age 3 months to 36 months                            | BMI z score and waist circumference at 36 months                                                              | Dietary quality, physical activity, screen time                                                                                        | Online educational content, emailed newsletters, nutrition expert                                                                            | Educational content will be made available online. First-time parent group will be mediated by a nutrition expert, for up to one hour per week.      |                                                                                                                                 |
| 12 | NCT01541761         | Starting Early Obesity Prevention Program | Gross    | USA       | RCT         | N= 533 women-child dyads  | Antenatally to 3 years (published data exists at 3 months) | Reduction in prevalence and degree of obesity at 3years (BMI percentiles), diet composition, infant lifestyle | (2x 3month published data: Infant feeding practices and maternal infant feeding knowledge (study 1) and infant activity time (Study 2) | Individual nutrition/breast feeding counselling, educational curriculum in group sessions at well baby visits supported by handouts and DVDs | Individual nutrition/breast feeding counselling, 15 nutrition and parenting support groups (NPSG) coordinated with well child visits, supported with | Usual care: Standard prenatal visits then standard Paediatric primary care (at 5days, 1month, 2months                           |



|  |              |                  |                                       |                                          |                                                                                                                                                                                                                                                                                                                                                                                                                                                                                                                                                                                                                                                                               |                        |
|--|--------------|------------------|---------------------------------------|------------------------------------------|-------------------------------------------------------------------------------------------------------------------------------------------------------------------------------------------------------------------------------------------------------------------------------------------------------------------------------------------------------------------------------------------------------------------------------------------------------------------------------------------------------------------------------------------------------------------------------------------------------------------------------------------------------------------------------|------------------------|
|  | 24mont<br>hs | at 24<br>months) | Eating<br>behaviours<br>Energy intake | consultant and<br>trained<br>researcher. | lactation<br>consultant<br>antenatally, at 1<br>week, 3-4<br>weeks, 3-<br>4months and 5<br>months (3x face<br>to face and 2x<br>via<br>telephone,10-<br>60mins<br>duration) to<br>support<br>prolonged milk<br>feeding and<br>delay of<br>complementary<br>feeding until<br>6months.<br>Followed by<br>face to face<br>meetings (30-<br>60min) with<br>trained<br>researcher at<br>5.5, 7and 9<br>months with<br>individualised<br>advice to<br>support to<br>assist mothers<br>with above plus<br>further<br>education on<br>appropriate<br>foods and<br>feeding cues.<br>Questionnaires<br>on baby led<br>approach<br>adherence at 6,<br>7, 8, 9, 12, and<br>24 months. BMI | and well<br>child care |
|--|--------------|------------------|---------------------------------------|------------------------------------------|-------------------------------------------------------------------------------------------------------------------------------------------------------------------------------------------------------------------------------------------------------------------------------------------------------------------------------------------------------------------------------------------------------------------------------------------------------------------------------------------------------------------------------------------------------------------------------------------------------------------------------------------------------------------------------|------------------------|



|    |                     |                          |                 |           |             |                           |                                    |                                                                                                                  |                                                |                                                                        |                                                                                                                                                          |                                                                                                                                                                                                                                                        |                                                               |                                       |
|----|---------------------|--------------------------|-----------------|-----------|-------------|---------------------------|------------------------------------|------------------------------------------------------------------------------------------------------------------|------------------------------------------------|------------------------------------------------------------------------|----------------------------------------------------------------------------------------------------------------------------------------------------------|--------------------------------------------------------------------------------------------------------------------------------------------------------------------------------------------------------------------------------------------------------|---------------------------------------------------------------|---------------------------------------|
|    |                     |                          |                 |           |             |                           |                                    |                                                                                                                  |                                                |                                                                        |                                                                                                                                                          | offered individual session when child is 9-10 months old, then group and phone sessions at 1.5,2,3, and 4 years old.                                                                                                                                   |                                                               |                                       |
| 17 | PMC4442409          | Early Obesity Prevention | Schroeder, 2015 | USA       | Cluster RCT | N= 232 infants            | Paediatric visit at 1 month of age | All paediatric visits at 1, 2, 4, 6, 9, 12, 15, 18, and 24 months of age, and at annual visits up to age 5 years | BMI, BMI Z score, triceps skinfolds, weight    | Parental dietary practices, breastfeeding duration, SNAP participation | Face to face, during all paediatric visits up till 24 months. Supportive phone call once a month and reminder post cards with short educational messages | Families receive 'growing leaps and bounds' program which includes : nutrition, physical activity, feeding patterns, enhancing parents self-efficiency to care for infants, helping parents make healthy food choices for their infants and themselves | Usual care: standard paediatric visits                        |                                       |
| 18 | ACTRN12616001470482 | CHAT                     | Wen 2017        | Australia | RCT (3 arm) | N=1056 mother-child dyads | Antenatal                          | Third trimester to child                                                                                         | BMI z-score at 12 and 24 months, breastfeeding | Child TV viewing time at 12 and 24 months; dietary                     | Mailed educational material,                                                                                                                             | The 12 sets of educational brochures are discussed at 1, 2, 4, 6, 9, 12, 15, 18, and 24 months paediatric visits                                                                                                                                       | Intervention arm 1 (SMS): Text messages providing information | Usual care: Routine childhood nursing |

|    |             |       |                 |     |     |                                                            |                                         |                                                     |                                                                                                                  |                                                                                                                                                                                                                                                                                                                                  |                                                                                                                                                             |                                                                                                                                                                                                                                                                       |                                                                                                                                                                                                                                                                                                                                                                 |                                                                                                                                                                                       |
|----|-------------|-------|-----------------|-----|-----|------------------------------------------------------------|-----------------------------------------|-----------------------------------------------------|------------------------------------------------------------------------------------------------------------------|----------------------------------------------------------------------------------------------------------------------------------------------------------------------------------------------------------------------------------------------------------------------------------------------------------------------------------|-------------------------------------------------------------------------------------------------------------------------------------------------------------|-----------------------------------------------------------------------------------------------------------------------------------------------------------------------------------------------------------------------------------------------------------------------|-----------------------------------------------------------------------------------------------------------------------------------------------------------------------------------------------------------------------------------------------------------------------------------------------------------------------------------------------------------------|---------------------------------------------------------------------------------------------------------------------------------------------------------------------------------------|
|    |             |       |                 |     |     |                                                            |                                         |                                                     | age 1<br>year                                                                                                    | ng rate at<br>12 months,<br>and timing<br>of<br>introductio<br>n of the<br>solids at 6<br>months                                                                                                                                                                                                                                 | quality at 24<br>months                                                                                                                                     | telephone or<br>SMS support                                                                                                                                                                                                                                           | about healthy<br>infant and child<br>feeding and<br>lifestyle twice a<br>week for 4<br>weeks.<br>Intervention<br>arm 2<br>(telephone<br>support)<br>6 staged<br>intervention<br>packages by<br>mail followed<br>by a phone call<br>from the<br>research nurse<br>within 1–2<br>weeks nurse<br>and discuss the<br>issues or<br>concerns raised<br>by the mother. | services<br>from<br>Communit<br>y Health<br>Services<br>plus home<br>safety<br>promotion<br>material<br>and<br>newsletter<br>on Kids<br>Safety 4<br>times over<br>the study<br>period |
| 15 | NCT03077425 | CHALO | Karasz,<br>2018 | USA | RCT | N=360<br>mothers<br>of<br>children<br>4-6<br>months<br>old | Home<br>visits at 6<br>months of<br>age | Childre<br>n aged<br>6<br>months<br>to 18<br>months | Quantity<br>of sippy<br>cups/<br>bottles,<br>number of<br>sippy<br>cups/bottle<br>s a day<br>(My smile<br>buddy) | Weight for<br>length, BMI for<br>age Z score,<br>weight velocity<br>Z score, added<br>sweeteners/solid<br>s, fruit and<br>vegetables/day,<br>sweetened<br>beverages, use of<br>bottles/sippy cup<br>at bed time,<br>sweet and salty<br>snacks, physical<br>activity, screen<br>time, tooth<br>brushing, dental<br>visits, caries | Home visits by<br>community<br>health workers,<br>follow up<br>telephone<br>support, patient<br>navigation to<br>keep timely<br>dental visits,<br>pamphlets | n=6 home visits<br>by health<br>works:<br><br>four of the<br>home visits<br>include only<br>mother-child<br>dyads which<br>focus on<br>building<br>rapport,<br>intimacy,<br>identifying<br>risks or family<br>concerns,<br>education,<br>discussing<br>goals, enhance | Enhanced<br>usual care,<br>pamphlet<br>containing<br>ECC and<br>obesity<br>prevention<br>messages.<br>and dental<br>referrals,                                                                                                                                                                                                                                  |                                                                                                                                                                                       |

|    |                  |                                                                              |                   |                 |     |                                      |                       |                           |                                              |                                                                                                                                                                               |                                                             |                                                                                                                                                                                                                        |                                                                                     |
|----|------------------|------------------------------------------------------------------------------|-------------------|-----------------|-----|--------------------------------------|-----------------------|---------------------------|----------------------------------------------|-------------------------------------------------------------------------------------------------------------------------------------------------------------------------------|-------------------------------------------------------------|------------------------------------------------------------------------------------------------------------------------------------------------------------------------------------------------------------------------|-------------------------------------------------------------------------------------|
|    |                  |                                                                              |                   |                 |     |                                      |                       |                           |                                              |                                                                                                                                                                               |                                                             | mother skills to identify infant hunger/satiety cues, and oral hygiene practices.                                                                                                                                      |                                                                                     |
|    |                  |                                                                              |                   |                 |     |                                      |                       |                           |                                              |                                                                                                                                                                               |                                                             | Two of the home visits at 8 and 14 months included either the father or mother in law                                                                                                                                  |                                                                                     |
| 20 | NCT03131284      | Prevention of Obesity in Toddlers (PROBIT) Trial                             | Morandi 2019      | Italy           | RCT | N=529 parent-newborn dyads           | First 2 weeks of life | Newborn to 2 years of age | BMI at 24 months of age                      | BMI at 12 months, lifestyle and feeding practices in the first 2 years of life                                                                                                | Educational program by Paediatricians during routine visits | Paediatricians were trained to provide parents with standardized lifestyle counselling supported by educational written material about the first two years of life during routine visits at 1, 3, 6, 12 and 24 months. | Usual care: Routine visits with regular Paediatrician at 1, 3, 6, 12 and 24 months  |
| 21 | NL6727 (NTR6938) | "Samen Happie!" An mHealth intervention to prevent obesity through parenting | Karsse van L 2017 | The Netherlands | RCT | N= 300 parent-child dyads (estimate) | 7-11 months           | 7-11 months until 4 years | Child BMI at 6 months, 12 months to 4 years. | Parental parenting weight-related behaviours (eating, drinking, sleeping, physical activity/screen time)<br>Weight-related behaviours of the child (healthy eating, drinking, | Mobile application                                          | Mobile application that teaches parents about health parenting practices and styles, but also allows parents to practice through various challenges. The information is grouped into                                   | Waitlist control condition (receive the app after the 12 month intervention period) |









|    |             |                |           |     |     |                                     |                   |                                   |                                                                    |                                                                                                          |                                            |                                                                                                                                                                                                                                                                                                                                                                                    |                                                                                                      |
|----|-------------|----------------|-----------|-----|-----|-------------------------------------|-------------------|-----------------------------------|--------------------------------------------------------------------|----------------------------------------------------------------------------------------------------------|--------------------------------------------|------------------------------------------------------------------------------------------------------------------------------------------------------------------------------------------------------------------------------------------------------------------------------------------------------------------------------------------------------------------------------------|------------------------------------------------------------------------------------------------------|
|    |             |                |           |     |     |                                     |                   |                                   |                                                                    |                                                                                                          |                                            | Participants will receive micronutrient powders (MNPs) from 6-24 months and a behavioural change to promote adequate infant and young child feeding practices and the use of MNPs will be delivered to mothers or caregivers. Behaviour change strategy uses ethnographic and marketing methods to promote adequate infant and young child feeding practices and the use of SQ-LNS |                                                                                                      |
| 25 | NCT03438721 | Strong Futures | Beck 2018 | USA | RCT | N=240 parent-child dyads (estimate) | Child age 2 weeks | Child age 2 weeks until 24 months | Child dietary intake<br>Child screen time<br>Parent health-related | Child anthropometrics (BMI z score at 6, 12, 15 and 24 months)<br>Parent financial stress<br>Child sleep | Education program during well child visits | Parents will receive education on infant feeding, sleep, and screen time practices just after well-child visits in the first year of life (2 weeks, 2, 4, 6, 9                                                                                                                                                                                                                     | Usual care: plus financial coaching; education on financial topics i.e. budgeting, savings, managing |

|    |             |          |                         |       |                |                                                  |                    |                                         |                    |                                                                                                                                                                                                                                                                                                                                 |                                           |                                                                                                                                                                                                                                                                                                                                                                                                                     |                                                                                                                                                                 |
|----|-------------|----------|-------------------------|-------|----------------|--------------------------------------------------|--------------------|-----------------------------------------|--------------------|---------------------------------------------------------------------------------------------------------------------------------------------------------------------------------------------------------------------------------------------------------------------------------------------------------------------------------|-------------------------------------------|---------------------------------------------------------------------------------------------------------------------------------------------------------------------------------------------------------------------------------------------------------------------------------------------------------------------------------------------------------------------------------------------------------------------|-----------------------------------------------------------------------------------------------------------------------------------------------------------------|
|    |             |          |                         |       |                |                                                  |                    |                                         | quality of<br>life | Parental feeding<br>styles                                                                                                                                                                                                                                                                                                      |                                           | and 12months).<br>The education<br>will be<br>provided by a<br>lay health<br>educator.<br>Parents will<br>also receive text<br>messages to<br>reinforce the<br>intervention<br>content                                                                                                                                                                                                                              | debt<br>(provided<br>by lay<br>health<br>educators<br>trained in<br>financial<br>coaching),<br>reinforced<br>by text<br>messages                                |
| 26 | NCT03444415 | PROGESPI | Perez-<br>Lopez<br>2018 | Spain | Cluster<br>RCT | N=414<br>parent-<br>child<br>dyads<br>(estimate) | Antenatal<br>study | Antenatally<br>until<br>24months<br>age | BMI at<br>24months | Weight growth<br>rate, Food intake<br>habits in parents,<br>physical activity<br>in parents,<br>Smoking habit in<br>parents,<br>Anthropometry<br>of parents (BMI),<br>duration of<br>breastfeeding,<br>Child dietary<br>habits, Physical<br>activity patterns<br>in children, Sleep<br>habits,<br>sociodemographic<br>variables | Motivational<br>Interviewing in<br>groups | 6x 90minute<br>group<br>workshops (2x<br>during<br>pregnancy, 4x<br>within two<br>years after<br>birth) by<br>trained<br>researchers (GP,<br>nurses,<br>Paediatricians<br>and midwives)<br>to encourage<br>healthy<br>lifestyles to<br>parents,<br>encourage<br>breastfeeding<br>and increase<br>knowledge and<br>self-efficacy to<br>promote health<br>habits re diet,<br>physical<br>activity and<br>sleep habits | Usual<br>care:<br>General<br>information<br>about<br>height,<br>weight<br>and BMI<br>percentile<br>by health<br>professionals<br>during<br>well child<br>visits |

|    |                  |                                                            |               |        |             |                                         |           |                          |                                                                                                                                                                   |                                                                                                                                                                                            |                                                                                                                                                  |                                                                                                                                                                                                                                                                                                                                      |                                                                                                          |
|----|------------------|------------------------------------------------------------|---------------|--------|-------------|-----------------------------------------|-----------|--------------------------|-------------------------------------------------------------------------------------------------------------------------------------------------------------------|--------------------------------------------------------------------------------------------------------------------------------------------------------------------------------------------|--------------------------------------------------------------------------------------------------------------------------------------------------|--------------------------------------------------------------------------------------------------------------------------------------------------------------------------------------------------------------------------------------------------------------------------------------------------------------------------------------|----------------------------------------------------------------------------------------------------------|
| 27 | ChiCTR1800017773 | SCHeLTI (Sino-Canadian Healthy Life Trajectory Initiative) | Wu 2018       | China  | Cluster RCT | N=4000 mother-child dyads (estimate)    | 6 weeks   | 6 weeks until 5 years    | BMI at 5 years                                                                                                                                                    | Fat mass index (child) at 5 years, skinfold thickness at 5 years, birthweight for gestational age prior to hospital discharge after delivery, weight-for-length z-score at <2 years of age | Face to face education sessions, group educational activities, text messaging, motivational web-based tools and apps, community based activities | Multifaceted intervention aiming to positively change behaviour with patient centred face to face sessions, group educational activities and social supports, text messaging to encourage personal goals and barriers to behaviour changes, motivational web-based tools and apps for self monitoring and community based activities | Usual care: plus access to web-based tools and Apps that provide information on child health and safety. |
| 28 | NCT03752762      | SPOON-Mexico                                               | Martinez 2018 | Mexico | RCT         | N=1200 caregiver-child dyads (estimate) | 0-6months | 0-6months until 24months | Infant and young child feeding practices<br>Height<br>Weight gain rate<br>Haemoglobin<br>Prevalence of obesity<br>Prevalence of stunting<br>Prevalence of anaemia | Adherence to Nutritional Supplement Regimen, Exclusive Breastfeeding                                                                                                                       | Home visits, group sessions, dietary supplement                                                                                                  | SQ-LNS supplement from 6-24 months and an innovative behavioural change strategy designed using ethnographic and marketing methods to promote adequate infant and young child feeding practices and the use of SQ-LNS via home                                                                                                       | Usual care: Standard health care services as specified by the Health Secretary                           |

|    |             |                           |              |     |     |                           |                            |                                      |                                    |                                                                              |                                                 |                                                                                                                                                                                                                                                                                                                                                                                                        |                                                                                                                                                                                                           |
|----|-------------|---------------------------|--------------|-----|-----|---------------------------|----------------------------|--------------------------------------|------------------------------------|------------------------------------------------------------------------------|-------------------------------------------------|--------------------------------------------------------------------------------------------------------------------------------------------------------------------------------------------------------------------------------------------------------------------------------------------------------------------------------------------------------------------------------------------------------|-----------------------------------------------------------------------------------------------------------------------------------------------------------------------------------------------------------|
|    |             |                           |              |     |     |                           |                            |                                      |                                    |                                                                              |                                                 | visits and group sessions. Data recorded at child age 6, 9, 12, 15,18, 21 & 24 months                                                                                                                                                                                                                                                                                                                  |                                                                                                                                                                                                           |
| 25 | NCT04042467 | Greenlight plus study(55) | Rothman 2019 | USA | RCT | N=900 parent-infant dyads | First newborn clinic visit | All child Dr visits from 0-24 months | Child weight for length trajectory | Weight for length Z score, BMI Z score trajectory, child overweight or obese | During all child clinic visits from 0-24 months | Families will receive the Greenlight intervention plus a health information technology (HIT) intervention aimed at supporting family goal-setting and behavior change. They will receive instructions on how to access the Greenlight technology platform (iOTA text messaging and website) Families will consistently receive text messages and goals set for children in the first two years of life | During child's clinic visits from 0 -24 months, parents will the receive the basic Greenlight material (low literacy, age specific education booklet) to promote healthy lifestyle and obesity prevention |

FAB: Feeding Activity Breastfeeding, NPSG: Nutrition Parenting Support Groups, LNSP- SQ: Lipid Nutrient Supplement Paste Small Quantity, MNP: Micronutrient Powders, POI: Prevention of Obesity in Infancy, SNAP: Supplemental Nutrition Assistance Program, WIC: Women, Infants, and Children Special Supplemental Nutrition Program, YHC: Youth Health Care

**Table S2.** Intervention delivery materials and procedures of early intervention studies for the prevention of obesity in infancy (N=29).

| Intervention Delivery                              |                     | Materials                         |                   |                                   |                         |                                 |                    | Procedures                             |                         |               |                           |
|----------------------------------------------------|---------------------|-----------------------------------|-------------------|-----------------------------------|-------------------------|---------------------------------|--------------------|----------------------------------------|-------------------------|---------------|---------------------------|
| Trial name                                         | Educational handout | Educational handout (image-based) | Educational video | Low literacy educational tool kit | Educational website/app | Educational material mailed out | Feeding supplement | Nutrition and parenting support groups | Phone call consultation | Home Visits   | Educational text messages |
| <b>TOTAL N (%)</b>                                 | <b>15(52)</b>       | <b>4(14)</b>                      | <b>2(7)</b>       | <b>3(10)</b>                      | <b>5(17)</b>            | <b>5(17)</b>                    | <b>2(7)</b>        | <b>7(24)</b>                           | <b>6(21)</b>            | <b>12(41)</b> | <b>4(14)</b>              |
| Healthy Beginnings                                 | x                   |                                   |                   |                                   |                         |                                 |                    |                                        |                         |               |                           |
| InFANT                                             | x                   |                                   |                   |                                   |                         |                                 |                    |                                        |                         |               |                           |
| NOURISH                                            | x                   |                                   |                   |                                   |                         |                                 |                    | x                                      |                         |               |                           |
| FYCS                                               | x                   |                                   |                   |                                   |                         |                                 |                    |                                        |                         |               |                           |
| POI.nz                                             | x                   | x                                 |                   |                                   |                         |                                 |                    | x                                      |                         | x             |                           |
| BeeBOFT                                            |                     |                                   |                   |                                   |                         | x                               |                    |                                        |                         | x             |                           |
| GREENLIGHT                                         | x                   |                                   |                   | x                                 |                         |                                 |                    |                                        |                         |               |                           |
| Addressing Health Literacy and Numeracy to Prevent | x                   |                                   |                   | x                                 |                         |                                 |                    |                                        |                         |               |                           |

[illegible]



|                       |   |  |   |   |   |   |   |   |   |
|-----------------------|---|--|---|---|---|---|---|---|---|
| Baby's first<br>bites | x |  |   |   |   | x |   | x |   |
| SPOON-<br>Guatemala   |   |  |   |   | x |   | x |   | x |
| Strong Futures        |   |  |   |   |   |   |   |   | x |
| PROGESPI              |   |  |   |   |   |   | x |   |   |
| SCHeLTI               |   |  |   | x |   |   | x |   | x |
| SPOON-<br>Mexico      |   |  |   |   |   | x | x |   | x |
| Greenlight<br>plus    | x |  | x | x |   |   |   |   | x |

Table S3. Intervention delivery agent.

[illegible]

[illegible]

[illegible]

**Table S4.** Intervention components/key messages of early intervention studies for the prevention of obesity in infancy (N=29).

| Trial name/acronym                                                   | Breast feeding/Bottle feeding advice | Intro of solids | Limit junk foods (eg sweets) | Repeat food exposure | Healthy dietary behaviours in children | Food serving size | Parenting / hunger satiety cues | Parent modelling | Fussy eating | Soothe / Sleep | Sleep promotion | Play/ activity | Tummy time | TV/ screen time | Oral hygiene practices | Growth chart education | HIT technology access education | Health-communication curriculum |
|----------------------------------------------------------------------|--------------------------------------|-----------------|------------------------------|----------------------|----------------------------------------|-------------------|---------------------------------|------------------|--------------|----------------|-----------------|----------------|------------|-----------------|------------------------|------------------------|---------------------------------|---------------------------------|
| Total N (%)                                                          | 16 (55)                              | 10 (34)         | 6 (21)                       | 3 (10)               | 24 (83)                                | 5 (17)            | 13 (45)                         | 13 (45)          | 5 (17)       | 3 (10)         | 10 (34)         | 20 (69)        | 3 (10)     | 9 (31)          | 1 (3)                  | 1 (3)                  | 1 (3)                           | 2 (7)                           |
| Healthy Beginnings                                                   | x                                    | x               | x                            |                      | x                                      |                   | x                               | x                | x            | x              |                 | x              |            | x               |                        |                        |                                 |                                 |
| InFANT                                                               |                                      |                 |                              |                      | x                                      |                   | x                               | x                | x            |                |                 | x              |            | x               |                        |                        |                                 |                                 |
| NOURISH                                                              |                                      |                 |                              | x                    | x                                      |                   | x                               | x                |              |                |                 |                |            |                 |                        |                        |                                 |                                 |
| FYCS                                                                 | x                                    |                 |                              |                      |                                        |                   |                                 |                  |              |                |                 |                |            |                 |                        |                        |                                 |                                 |
| POI.nz                                                               | x                                    | x               |                              |                      | x                                      |                   |                                 |                  |              |                | x               | x              |            |                 |                        |                        |                                 |                                 |
| BeeBOFT                                                              |                                      |                 | x                            |                      | x                                      |                   |                                 |                  |              |                |                 | x              |            | x               |                        |                        |                                 |                                 |
| GREENLIGHT                                                           | x                                    |                 |                              |                      | x                                      |                   |                                 | x                |              |                | x               | x              |            | x               |                        |                        |                                 | x                               |
| Addressing Health Literacy and Numeracy to Prevent Childhood Obesity | x                                    |                 |                              |                      | x                                      |                   |                                 | x                |              |                | x               | x              |            | x               |                        |                        |                                 | x                               |
| INSIGHT                                                              |                                      |                 |                              | x                    | x                                      |                   | x                               |                  | x            | x              | x               | x              |            |                 |                        | x                      |                                 |                                 |
| Early STOPP                                                          |                                      |                 |                              |                      | x                                      |                   |                                 |                  |              |                | x               | x              |            |                 |                        |                        |                                 |                                 |
| InFANT EXTEND                                                        |                                      |                 |                              |                      | x                                      |                   | x                               | x                | x            |                |                 | x              |            | x               |                        |                        |                                 |                                 |
| Starting Early Obesity Prevention Program                            |                                      |                 |                              |                      | x                                      | x                 | x                               | x                | x            | x              | x               | x              |            |                 |                        |                        |                                 |                                 |
| HLPP                                                                 |                                      |                 |                              |                      | x                                      | x                 |                                 |                  |              |                |                 |                |            |                 |                        |                        |                                 |                                 |
| BLISS                                                                | x                                    | x               |                              |                      |                                        |                   | x                               |                  |              |                |                 |                |            |                 |                        |                        |                                 |                                 |
| Preventing obesity                                                   | x                                    |                 | x                            |                      |                                        |                   | x                               |                  |              |                |                 | x              |            |                 |                        |                        |                                 |                                 |

|                          |   |   |   |   |   |   |   |   |  |   |   |   |   |   |  |   |
|--------------------------|---|---|---|---|---|---|---|---|--|---|---|---|---|---|--|---|
| through early guidance   |   |   |   |   |   |   |   |   |  |   |   |   |   |   |  |   |
| PRIMROSE                 |   |   |   | x |   |   | x |   |  |   | x |   |   |   |  |   |
| Early Obesity Prevention | x | x |   | x | x | x | x |   |  |   | x |   |   |   |  |   |
| CHAT                     | x | x |   | x | x |   | x |   |  |   | x | x | x |   |  |   |
| CHALO                    | x | x |   |   |   |   | x |   |  |   | x | x |   | x |  |   |
| PROBIT                   | x | x | x |   | x | x | x |   |  |   | x |   |   |   |  |   |
| Samen Happie             | x |   |   |   | x |   |   |   |  | x | x |   |   |   |  |   |
| Family Spirit Nurture    | x |   | x |   | x |   | x | x |  |   |   | x | x | x |  |   |
| Baby's first bites       |   | x |   | x |   |   | x |   |  |   |   |   |   |   |  |   |
| SPOON-Guatemala          | x | x |   |   | x |   |   |   |  |   |   |   |   |   |  |   |
| Strong Futures           |   |   |   |   | x |   |   |   |  | x |   |   | x |   |  |   |
| PROGESPI                 | x |   |   |   | x |   |   | x |  |   | x | x |   |   |  |   |
| SCHeLTI                  | x |   |   |   | x |   |   |   |  |   | x | x |   |   |  |   |
| SPOON-Mexico             | x | x |   |   | x |   |   |   |  |   |   |   |   |   |  |   |
| Greenlight plus          |   |   |   |   | x |   |   | x |  |   |   |   |   |   |  | x |

**Table S5.** Theoretical Models.

| Theoretical models used<br>Trial name                                | Social cognitive theory | Social-ecological theories | Social learning theory | Health beliefs model | Behavioural model | Attachment theory | Transtheoretical model of change | Ecological developmental theory | Theory of planned behaviour | McGuire communication model | Common Risk/Health Factor Approach (CR/HFA) | Not listed    |
|----------------------------------------------------------------------|-------------------------|----------------------------|------------------------|----------------------|-------------------|-------------------|----------------------------------|---------------------------------|-----------------------------|-----------------------------|---------------------------------------------|---------------|
| <b>TOTAL N (%)</b>                                                   | <b>10(34)</b>           | <b>1(3)</b>                | <b>5(17)</b>           | <b>3(10)</b>         | <b>1(3)</b>       | <b>2(7)</b>       | <b>1(3)</b>                      | <b>1(3)</b>                     | <b>1(3)</b>                 | <b>1(3)</b>                 | <b>1(3)</b>                                 | <b>16(55)</b> |
| Healthy Beginnings                                                   |                         |                            | x                      | x                    |                   |                   |                                  |                                 |                             |                             |                                             |               |
| InFANT                                                               | x                       |                            |                        |                      |                   |                   |                                  |                                 |                             |                             |                                             |               |
| NOURISH                                                              | x                       |                            |                        |                      |                   | x                 |                                  |                                 |                             |                             |                                             |               |
| FYCS                                                                 |                         |                            |                        |                      |                   |                   |                                  |                                 |                             |                             |                                             | x             |
| POI.nz                                                               |                         |                            |                        |                      |                   |                   |                                  |                                 |                             |                             |                                             | x             |
| BeeBOFT                                                              | x                       | x                          | x                      |                      |                   |                   |                                  |                                 | x                           | x                           |                                             |               |
| GREENLIGHT                                                           | x                       |                            |                        |                      |                   |                   |                                  |                                 |                             |                             |                                             |               |
| Addressing Health Literacy and Numeracy to Prevent Childhood Obesity | x                       |                            |                        |                      |                   |                   |                                  |                                 |                             |                             |                                             |               |
| INSIGHT                                                              |                         |                            |                        |                      |                   |                   |                                  |                                 |                             |                             |                                             | x             |
| Early STOPP                                                          | x                       |                            |                        |                      | x                 |                   | x                                |                                 |                             |                             |                                             |               |
| InFANT EXTEND                                                        |                         |                            |                        |                      |                   |                   |                                  |                                 |                             |                             |                                             | x             |
| Starting Early Obesity Prevention Program                            | x                       |                            | x                      | x                    |                   |                   |                                  |                                 |                             |                             |                                             |               |





**Table S6.** Funding Sources.

| <b>Study</b>                                                         | <b>Funding Sources</b>                                                                                                                                                                                                                                                                                                                                                                 |
|----------------------------------------------------------------------|----------------------------------------------------------------------------------------------------------------------------------------------------------------------------------------------------------------------------------------------------------------------------------------------------------------------------------------------------------------------------------------|
| Healthy Beginnings                                                   | Australian National Health and Medical Research Council                                                                                                                                                                                                                                                                                                                                |
| INFANT                                                               | Australian National Health and Medical Research Council                                                                                                                                                                                                                                                                                                                                |
| NOURISH                                                              | Australian National Health and Medical Research Council<br>HJ Heinz<br>Meat and Livestock Australia<br>Department of Health South Australia<br>Food standards Australia New Zealand<br>Queensland University of technology<br>Roberta Holmes Transition to contemporary Parenthood Program (La Trobe University)                                                                       |
| Feeding Young Children Study                                         | US department of Agriculture<br>National Institute of Food and Agriculture                                                                                                                                                                                                                                                                                                             |
| POI.nz                                                               | Health Research Council New Zealand<br>Southern District Health Board                                                                                                                                                                                                                                                                                                                  |
| BeeBOFT                                                              | ZonMW- Netherlands Organisation of Health Research and Development<br>NOW- Netherlands organisation for scientific research                                                                                                                                                                                                                                                            |
| GREENLIGHT                                                           | Eunice Kennedy National Institute of Child Health and Human Development<br>Centers for Disease Control and Prevention<br>Office of Behavioural and Social Science Research<br>National Institutes of Health<br>Robert Wood Johnson Foundation Physician Faculty Scholars Program<br>Health Resources and Services Administration<br>KiDS of the New York University Langone Foundation |
| Addressing Health Literacy and Numeracy to Prevent Childhood Obesity | NYU Langone Health<br>National Institutes of Health                                                                                                                                                                                                                                                                                                                                    |

|                                                     |                                                                                                                                                                                                                                                                                                                        |
|-----------------------------------------------------|------------------------------------------------------------------------------------------------------------------------------------------------------------------------------------------------------------------------------------------------------------------------------------------------------------------------|
| INSIGHT                                             | National Institute of Diabetes and Digestive and Kidney Diseases (NIDDK)<br>National institute of Health<br>National Center for Advancing Translational Sciences<br>The Children's Miracle Network (Penn State Children's Hospital)<br>US Department of Agriculture<br>Penn State Clinical and Translational Institute |
| Early STOPP                                         | FAS<br>Vinnova<br>Medical Research Council<br>The Karolinska Institute                                                                                                                                                                                                                                                 |
| INFANT extend                                       | Australian National Health and Medical Research Council<br>National Heart Foundation<br>World Cancer Research Fund International                                                                                                                                                                                       |
| Starting Early Obesity Prevention Program           | National Institute of Food and agriculture<br>National institute of Health/Child Health and Human development                                                                                                                                                                                                          |
| HLPP                                                | Bronx-Lebanon Hospital Center Health Care System<br>United Healthcare Foundation                                                                                                                                                                                                                                       |
| BLISS                                               | Lottery Health Research<br>Meat and Livestock Australia<br>Karitane Products Society<br>University of Otago<br>Heinz Watties Ltd<br>Perpetual trustees<br>NZ federation of Woman's Institutes                                                                                                                          |
| Preventing Childhood Obesity through early guidance | National institute of Health<br>National Institute of Diabetes and Digestive and Kidney Diseases (NIDDK)<br>Arizona State University College of Nursing and Health Innovation                                                                                                                                          |

|                           |                                                                             |
|---------------------------|-----------------------------------------------------------------------------|
| PRIMROSE                  | Swedish Research Council for Health                                         |
|                           | The Swedish Council for Working Life and Welfare                            |
|                           | The Swedish Research Council                                                |
|                           | The Research and Development Committee                                      |
|                           | Stockholm, Uppsala and Sormland County Council                              |
|                           | Regional Research Council of the Uppsala and Orebre Health Care Region      |
|                           | The Public Health Committee of Stockholm County Council                     |
|                           | The Vardal Foundation                                                       |
|                           | AFA insurance                                                               |
|                           | The foundation of the Swedish Diabetes Society                              |
|                           | The Karolinska Health Care Sciences Postgraduate School                     |
| Early Obesity Prevention: | The Karolinska Institute                                                    |
|                           | Dannon Institute (USA)                                                      |
| CHAT                      | NSW Ministry of Health                                                      |
|                           |                                                                             |
| CHALO                     | Grant from the National Institute on Minority Health and Health Disparities |
| PROBIT                    | Regione Vento                                                               |
|                           | University of Verona                                                        |
| Samen Happie              | Behavioural Science Institute, Radbound Univeristy                          |
|                           |                                                                             |
| Family Spirit Nurture     | Eunice Kennedy National Institute of Child Health and Human Development     |
|                           | Share Our Strength                                                          |
|                           | Indian Health service                                                       |
|                           | John Hopkins University Discovery Award                                     |
| Baby's first bites        | NWO - Netherlands organisation for scientific research                      |
|                           | Danone Nutricia research                                                    |
| SPOON Guatemala           | Inter-American Developmental Bank                                           |
|                           | The PepsiCo Foundation                                                      |
|                           | JPO-JSF Poverty Reduction Program                                           |

|                 |                                                                                                                                                                                                                                                                                               |
|-----------------|-----------------------------------------------------------------------------------------------------------------------------------------------------------------------------------------------------------------------------------------------------------------------------------------------|
|                 | Fundazúcar                                                                                                                                                                                                                                                                                    |
| Strong futures  | University of California<br>Eunice Kennedy National Institute of child health and human development                                                                                                                                                                                           |
| PROGESPI        | FFIS (Fundacion para la Formacion e Investigacion Sanitarias de la Region de Murcia)                                                                                                                                                                                                          |
| SCHeLTI         | International Peace Maternity and Child Health Hospital affiliated to Shanghai Jiao Tong University, School of Medicine<br>University of Sherbrooke<br>University of Sherbrooke, Health Campus<br>National Science Foundation of China(NSFC)<br>Canadian Institutes of Health Research (CIHR) |
| SPOON Mexico    | Inter-American Development Bank<br>Hospital Infantil de Mexico Federico Gomez<br>Servicios de Salud de Nayarit<br>The PepsiCo Foundation                                                                                                                                                      |
| Greenlight plus | Vanderbilt University Medical Center<br>Patient-Centered Outcomes Research Institute<br>Duke University<br>University of North Carolina, Chapel Hill<br>Stanford University<br>NYU Langone Health<br>University of Miami                                                                      |

**Table S7.** Effectiveness of trial intervention on secondary outcomes.

| Study, Author, Year            | Sample Size | Outcome                         | Reported Outcome at End of Follow Up |                    | Effect Size                                 |
|--------------------------------|-------------|---------------------------------|--------------------------------------|--------------------|---------------------------------------------|
|                                |             |                                 | Control Group                        | Intervention Group |                                             |
| Healthy Beginnings, Wen, 2012, | N = 667     | <b>At 2 years</b>               |                                      |                    |                                             |
|                                |             | Vegetable $\geq 1$ serving/day  | 83%                                  | 89%                | Difference: 7, CI (1 to 13), $p = 0.03$     |
|                                |             | Fruit $\geq 1$ serving/day      | 93%                                  | 90%                | Difference: -2, CI (-7 to 3), $p = 0.43$    |
|                                |             | Food for reward                 | 72%                                  | 62%                | Difference: -9, CI (-17 to -1), $p = 0.03$  |
|                                |             | Water $> 3$ cups/day            | 19%                                  | 24%                | Difference 6, CI (-1 to 13), $p = 0.12$     |
|                                |             | Hot chips/French fries          | 88%                                  | 86%                | Difference -1, CI (-7 to 5), $p = 0.65$     |
|                                |             | Salty snack                     | 70%                                  | 65%                | Difference -5, CI (-13 to 4), $p = 0.29$    |
|                                |             | Sweet snack every day           | 77%                                  | 73%                | Difference: -4, CI (-12 to 4), $p = 0.31$   |
|                                |             | Soft drink                      | 26%                                  | 24%                | Difference: -3, CI (-10 to 5), $p = 0.48$   |
|                                |             | Outdoor play $\geq 120$ min/day | 61%                                  | 62%                | Difference: 1, CI (-8 to 9), $p = 0.9$      |
|                                |             | TV on during meal               | 76%                                  | 66%                | Difference: -10, CI (-18 to -2), $p = 0.02$ |
|                                |             | Eat dinner in front of TV       | 68%                                  | 56%                | Difference: -12, CI (-21 to -3), $p = 0.01$ |
|                                |             | Viewing TV $> 60$ min/day       | 22%                                  | 14%                | Difference: -8, CI (-15 to -1), $p = 0.02$  |
| Healthy Beginnings, Wen, 2015, |             | <b>At 3.5 years</b>             |                                      |                    |                                             |
|                                |             | Vegetable $\geq 2$ serving/day  | 45.1%                                | 44.5%              | aOR 0.39 (95% CI, 0.62 to 1.45), $p = 0.82$ |
|                                |             | Fruit $\geq 2$ serving/day      | 68.6%                                | 69.7%              | aOR 1.11 (95% CI, 0.71 to 1.74), $p = 0.65$ |
|                                |             | Food for reward                 | 70.1%                                | 73%                | aOR 1.14 (95% CI, 0.72 to 1.81), $p = 0.58$ |
|                                |             | Salty snack                     | 79.9%                                | 80.1%              | aOR 1.05 (95% CI, 0.63 to 1.75), $p = 0.85$ |
|                                |             |                                 |                                      |                    |                                             |

|                           |       |       |                                           |
|---------------------------|-------|-------|-------------------------------------------|
| Confectionery             | 28.9% | 33.2% | aOR 1.26 (95% CI, 0.80 to 1.99), p = 0.32 |
| Soft drink                | 68.1% | 66.4% | aOR 0.96 (95% CI, 0.62 to 1.48), p = 0.86 |
| Outdoor play ≥120 min/day | 73%   | 64.9% | aOR 0.84 (95% CI, 0.54 to 1.31), p = 0.45 |
| TV on during meal         | 6.4%  | 11.4% | aOR 1.68 (95% CI, 0.79 to 3.58), p = 0.18 |
| Eat dinner in front of TV | 43.3% | 42.4% | aOR 0.89 (95% CI, 0.56 to 1.4), p = 0.61  |
| Viewing TV >60 min/day    | 67.4% | 72.8% | aOR 1.31 (95% CI, 0.81 to 2.14), p = 0.27 |
| <b>At 5 years</b>         | 65.2% | 62.3% | aOR 0.97 (95% CI, 0.61 to 1.53), p = 0.89 |
| Vegetable ≥2 serving/day  | 67.4% | 65.4% | aOR 0.95 (95% CI, 0.60 to 1.50), p = 0.83 |
| Fruit ≥2 serving/day      | 86%   | 79.1% | aOR 0.71 (95% CI, 0.40 to 1.28), p = 0.25 |
| Food for reward           | 39.3% | 37.2% | aOR 0.91 (95% CI, 0.58 to 1.42), p = 0.67 |
| Salty snack               | 65.2% | 67.5% | aOR 1.07 (95% CI, 0.67 to 1.71), p = 0.77 |
| Confectionery             | 71.3% | 70.2% | aOR 1.12 (95% CI, 0.69 to 1.80), p = 0.65 |
| Soft drink                | 55.1% | 55.5% | aOR 1.15 (95% CI, 0.74 to 1.77), p = 0.54 |
| Outdoor play ≥120 min/day | 10%   | 10%   | aOR 0.89 (95% CI, 0.44 to 1.83), p = 0.76 |
| TV on during meal         |       |       |                                           |
| Eat dinner in front of TV |       |       |                                           |

---

Viewing TV >60

min/day

|                           |                    |                                 |       |       |                                                              |
|---------------------------|--------------------|---------------------------------|-------|-------|--------------------------------------------------------------|
| INFANT,<br>Campbell, 2013 | N = 457            | Child diet at 20 months         |       |       | Mean difference                                              |
|                           |                    | Fruit intake (g/d)              | 152.9 | 161.2 | 13.33 (95% CI, -2.59 to 29.25), p = 0.1                      |
|                           |                    | Vegetable intake (g/d)          | 80.8  | 85.3  | Mean difference 6.62 (95% CI, -2.51 to 15.76), p = 0.16      |
|                           |                    | Water intake (g/d)              | 338.7 | 362.9 | Mean difference 30.28 (95% CI, -3.30 to 63.87), p = 0.08     |
|                           |                    | Noncore drink intake (g/d)      | 25.4  | 23.7  | Mean difference -5.56 (95% CI, -17.48 to 6.36), p = 0.36     |
|                           |                    | Sweet snack intake (g/d)        | 14.7  | 11.0  | Mean difference -3.60 (95% CI, -6.34 to -0.86), p = 0.01     |
|                           |                    | Savoury snack intake (g/d)      | 5.8   | 4.8   | Mean difference -1.02 (95% CI -2.82 to 0.79), p = 0.27       |
|                           |                    | Child physical activity (min/d) | 236.8 | 224.1 | Mean difference -2.03 (95% CI, -9.75 to 5.70), p = 0.61      |
| INFANT,<br>Hesketh, 2020  | N = 361<br>N = 337 | Television viewing (min/d)      | 60.6  | 45.5  | Mean difference -17.12 (95% CI, -26.45 to -7.79), p = <0.001 |
|                           |                    | Child diet at 3.6 years         | -     | -     | Standardised effect size 0.23 (95% CI, 0.01 to 0.45)         |
|                           |                    | Fruit intake (g/d)              | -     | -     |                                                              |
|                           |                    | Vegetable intake at 3.6 years   | -     | -     | Standardised effect size 0.28 (95% CI, 0.05 to 0.51)         |
|                           |                    | Water intake at 3.6 years       | -     | -     | Standardised effect size 0.41 (95% CI, 0.14 to 0.67)         |
|                           |                    | Fruit variety at 3.6 years      | -     | -     | Standardised effect size 0.13 (95% CI, -0.10 to 0.35)        |
|                           |                    | Vegetable variety at 3.6 years  | -     | -     | Standardised effect size 0.24 (95% CI, 0.03 to 0.45)         |
|                           |                    | Non core drinks at 3.6 years    | -     | -     | Standardised effect size 0.08 (95% CI, -0.18 to 0.33)        |

|                                      |   |   |                                                         |
|--------------------------------------|---|---|---------------------------------------------------------|
| Sweet snacks intake at 3.6 years     | - | - | Standardised effect size -0.24 (95% CI, -0.42 to -0.07) |
| Savory snack intake at 3.6 years     | - | - | Standardised effect size -0.06 (95% CI, -0.23 to 0.12)  |
| Television viewing at 3.6 years      | - | - | Standardised effect size -0.08 (95% CI, -0.25 to 0.09)  |
| Sitting time at 3.6 years            | - | - | Standardised effect size -0.13 (95% CI, -0.49 to 0.23)  |
| Child physical activity at 3.6 years | - | - | Standardised effect size 0 (95% CI, -0.26 to 0.27)      |
| Light intensity PA at 3.6 years      | - | - | Standardised effect size 0.17 (95% CI, -0.11 to 0.44)   |
| Moderate to vigorous PA at 3.6 years | - | - | Standardised effect size -0.21 (95% CI, -0.50 to 0.08)  |
| Child diet at 5 years                | - | - | Standardised effect size 0.07 (95% CI, -0.14 to 0.27)   |
| Fruit intake (g/d)                   | - | - |                                                         |
| Vegetable intake at 5 years          | - | - | Standardised effect size 0.11 (95% CI, -0.10 to 0.32)   |
| Water intake at 5 years              | - | - | Standardised effect size 0.19 (95% CI, -0.03 to 0.40)   |
| Fruit variety at 5 years             | - | - | Standardised effect size 0.12 (95% CI, -0.10 to 0.33)   |
| Vegetable variety at 5 years         | - | - | Standardised effect size 0.14 (95% CI, -0.06 to 0.34)   |
| Non core drinks at 5 years           | - | - | Standardised effect size -0.17 (95% CI, -0.33 to -0.00) |
| Sweet snacks intake at 5 years       | - | - | Standardised effect size -0.26 (95% CI, -0.47 to -0.05) |
| Savory snack intake at 5 years       | - | - | Standardised effect size 0.00 (95% CI, -0.22 to 0.23)   |



|                                                     |           |                                                                   |          |          |                                                        |
|-----------------------------------------------------|-----------|-------------------------------------------------------------------|----------|----------|--------------------------------------------------------|
|                                                     |           | Television viewing at 5 years                                     | -        | -        | Standardised effect size -0.15 (95% CI, -0.33 to 0.03) |
|                                                     |           | Sitting time at 5 years                                           | -        | -        | Standardised effect size -0.08 (95% CI, -0.26 to 0.10) |
|                                                     |           | Child physical activity at 5 years                                | -        | -        | Standardised effect size 0 (95% CI, -0.26 to 0.25)     |
|                                                     |           | Light intensity PA at 5 years                                     | -        | -        | Standardised effect size 0.15 (95% CI, -0.09 to 0.38)  |
|                                                     |           | Moderate to vigorous PA at 5 years                                | -        | -        | Standardised effect size -0.16 (95% CI, -0.42 to 0.18) |
| <hr/>                                               |           |                                                                   |          |          |                                                        |
| NOURISH,<br>Daniels, 2013                           | N = 698   |                                                                   |          |          |                                                        |
| Response to refusal of familiar foods               | * N = 466 | Insist child eats it<br>At 2 years                                | 37 (90)  | 18 (39)  | p < 0.001                                              |
| <hr/>                                               |           |                                                                   |          |          |                                                        |
|                                                     | * N = 464 | Offer milk drink instead<br>At 2 years                            | 22 (53)  | 14 (30)  | p = 0.022                                              |
| <hr/>                                               |           |                                                                   |          |          |                                                        |
|                                                     | * N = 465 | Offer liked food instead<br>At 2 years                            | 78 (189) | 63 (140) | p = 0.001                                              |
| <hr/>                                               |           |                                                                   |          |          |                                                        |
|                                                     | * N = 466 | Encourage to eat: turn mealtime into game<br>At 2 years           | 57 (139) | 21 (47)  | p < 0.001                                              |
| <hr/>                                               |           |                                                                   |          |          |                                                        |
|                                                     | * N = 465 | Offer food reward<br>At 2 years                                   | 31 (75)  | 9 (19)   | p < 0.001                                              |
| <hr/>                                               |           |                                                                   |          |          |                                                        |
|                                                     | * N = 464 | Encourage to eat: offer nonfood reward<br>At 2 years              | 27 (65)  | 18 (39)  | p = 0.026                                              |
| <hr/>                                               |           |                                                                   |          |          |                                                        |
|                                                     | * N = 464 | Accept that child may not be hungry; take food away<br>At 2 years | 91 (222) | 96 (213) | p = 0.033                                              |
| <hr/>                                               |           |                                                                   |          |          |                                                        |
| Response to refusal of unfamiliar foods (neophobia) | * N = 457 | Assume child dislikes; do not offer again<br>At 2 years           | 13 (32)  | 5 (11)   | p = 0.033                                              |

|                                                              |              |                                                                                             |          |          |           |
|--------------------------------------------------------------|--------------|---------------------------------------------------------------------------------------------|----------|----------|-----------|
|                                                              |              |                                                                                             |          |          |           |
|                                                              | * N =<br>456 | Disguise food<br>At 2 years                                                                 | 65 (156) | 45 (98)  | p < 0.001 |
|                                                              | * N =<br>462 | Offer with liked food<br>At 2 years                                                         | 94 (229) | 94 (206) | p = 0.99  |
|                                                              | * N =<br>465 | Times offered a food<br>before deciding<br>whether liked ( $\leq 6$<br>times)<br>At 2 years | 35 (87)  | 72 (159) | p < 0.001 |
| NOURISH,<br>Daniels, 2015                                    | * N =<br>390 | Insist child eats it at 5<br>years                                                          | 65 (126) | 48 (94)  | p = 0.001 |
| Response to<br>refusal of familiar<br>foods                  | * N =<br>391 | Offer milk drink<br>instead at 5 years                                                      | 6 (11)   | 3 (6)    | p = 0.22  |
|                                                              | * N =<br>389 | Offer liked food instead<br>at 5 years                                                      | 41 (78)  | 37 (72)  | p = 0.47  |
|                                                              | * N =<br>391 | Encourage to eat<br>Feed child with<br>spoon/fork at 5 years                                | 53 (103) | 42 (84)  | p = 0.034 |
|                                                              | * N =<br>390 | Offer food reward<br>at 5 years                                                             | 63 (120) | 42 (83)  | p < 0.001 |
|                                                              | * N =<br>390 | Offer non-food reward<br>at 5 years                                                         | 39 (74)  | 29 (58)  | p = 0.055 |
| Responsive<br>feeding strategies                             | * N =<br>391 | Offer no food until next<br>usual meal/snack time<br>at 5 years                             | 64 (123) | 77 (152) | p = 0.006 |
|                                                              | * N =<br>389 | Accept that child may<br>not be hungry; take<br>food away at 5 years                        | 79 (152) | 88 (173) | p = 0.014 |
| Response to<br>refusal of<br>unfamiliar foods<br>(neophobia) | * N =<br>382 | Assume child dislikes;<br>do not offer again at 5<br>years                                  | 14 (27)  | 13 (25)  | p = 0.88  |
|                                                              | * N =<br>382 | Disguise food at 5 years                                                                    | 53 (102) | 41 (78)  | p = 0.018 |
|                                                              | * N =<br>391 | Offer with liked food at<br>5 years                                                         | 92 (178) | 93 (184) | p = 0.85  |

|                                            |         |                                                                                 |                        |                                  |                                           |
|--------------------------------------------|---------|---------------------------------------------------------------------------------|------------------------|----------------------------------|-------------------------------------------|
|                                            |         | Times offered a food before deciding whether liked ( $\leq 6$ times) at 5 years | 55 (107)               | 39 (77)                          | p = 0.002                                 |
| Feeding Young Children Study, Bonuck, 2013 | N = 135 | Bottle frequency (any use, %)                                                   | 44%                    | 33%                              | 11% difference in prevalence, p = 0.25    |
| POI.nz, Fangupo, 2015                      | N = 495 | Offered 2 fruits a day (%)                                                      | Control + sleep<br>94% | FAB + Sleep<br>96%               | RR 1.02 (95% CI, 0.98 to 1.06), p = 0.455 |
|                                            |         | Offered 2 vegetables a day (%)                                                  | Control + sleep<br>96% | FAB + Sleep<br>98%               | RR 1.02 (95% CI, 0.99 to 1.05), p = 0.282 |
|                                            |         | Used a cup, not bottle (%)                                                      | Control + sleep<br>47% | FAB + Sleep<br>53%               | RR 1.13 (95% CI, 0.95 to 1.35), p = 0.16  |
|                                            |         | Daily breakfast (%)                                                             | Control + sleep<br>91% | FAB + Sleep<br>93%               | RR 1.02 (95% CI, 0.97 to 1.08), p = 0.375 |
|                                            |         | Family dinner at the table (%)                                                  | Control + sleep<br>66% | FAB + Sleep<br>59%               | RR 0.9 (95% CI, 0.79 to 1.04), p = 0.146  |
|                                            | N = 502 | Did not eat meals in front of the TV (%)                                        | Control + sleep<br>15% | FAB + Sleep<br>17%               | RR 1.16 (95% CI, 0.78 to 1.74), p = 0.464 |
|                                            |         | Household fruit and vegetable availability (mean)                               | Control + sleep<br>31  | FAB + Sleep<br>32                | RR 0.99 (95% CI, -0.5 to 2.48), p = 0.194 |
|                                            |         | Number of obesogenic foods in household (mean number)                           | Control + sleep<br>21  | FAB + Sleep<br>21                | RR 0.39 (95% CI, -0.88 to 1.66), p = 0.39 |
| POI.nz, Taylor, 2018                       | N = 592 | Night sleep, duration (hour)                                                    | Controls<br>11.6       | FAB SleepCombo<br>11.5 11.6 11.5 | p = 0.74                                  |
|                                            |         | Night awakenings (number per night)                                             | Controls<br>1.6        | FAB SleepCombo<br>1.7 1.6 1.5    | p = 0.66                                  |
|                                            | N = 602 | Bedtime resistance score (mean occurrence)                                      | Controls<br>0.13       | FAB SleepCombo<br>0.15 0.11 0.12 | p = 0.011                                 |
|                                            | N = 351 | Light to vigorous physical activity (mins per day)                              | Controls<br>231        | FAB SleepCombo<br>240 232 236    | p = 0.63                                  |

|                        |          |                                                          |           |          |                                                  |
|------------------------|----------|----------------------------------------------------------|-----------|----------|--------------------------------------------------|
| BeeBOFT, Grieken, 2017 | N = 1543 | Health related behaviours: Breakfast daily (%)           | 96.7%     | 98.3%    | 1.6% difference, p = 0.03                        |
|                        |          | Activity and outside play (hours/day, mean SD)           | 2.56      | 2.68     | Mean SD difference 0.12, p = 1.9                 |
|                        |          | Sweetened sugar beverage consumption (glasses/day, mean) | 2.31      | 2.10     | Mean difference -0.21 glasses per day, p = 0.003 |
|                        |          | Television/computer time (hours/day mean)                | 1.22      | 1.05     | Mean difference -0.17 h/day, p < 0.001           |
| <hr/>                  |          |                                                          |           |          |                                                  |
| INSIGHT, Adams, 2018   | N = 279  | Met 2012 AAP screen time guidelines                      |           |          |                                                  |
|                        |          | 44 weeks                                                 | 30.2      | 53       | p < 0.01                                         |
|                        |          | 1.5 years                                                | 15.9      | 23.5     | p = 0.15                                         |
|                        |          | 2.5 years                                                | 59.8      | 60.9     | p = 0.87                                         |
|                        |          | Television on during infant meals                        |           |          |                                                  |
|                        |          | 44 weeks                                                 | 45.7%     | 32.5%    | p = 0.04                                         |
|                        |          | 1.5 years                                                | 68.1%     | 48.7%    | p < 0.01                                         |
|                        |          | 2.5 years                                                | 78.4%     | 66.4%    | p = 0.05                                         |
|                        |          | Children engagement in daily outdoor play at 2 years     |           |          |                                                  |
|                        |          | 15.1%                                                    | 30.0%     | p = 0.01 |                                                  |
|                        |          | Dietary intake of children at 1 year                     |           |          |                                                  |
|                        |          | salty snacks                                             | 20.3%     | 9.8%     | p = 0.03                                         |
| vegetables daily       | 89.0%    | 95.9%                                                    | p = 0.049 |          |                                                  |
| <hr/>                  |          |                                                          |           |          |                                                  |
| INSIGHT, Savage, 2018  | N = 279  | Use of feeding to soothe                                 |           |          |                                                  |
|                        |          | Context based                                            |           |          |                                                  |
|                        |          | 8 weeks                                                  | 2.83      | 2.57     | p = 0.008                                        |
|                        |          | 16 weeks                                                 | 2.76      | 2.5      | p = 0.009                                        |
|                        |          | 32 weeks                                                 | 2.43      | 2        | p < 0.0001                                       |
|                        |          | 44 weeks                                                 | 2.56      | 2.16     | p < 0.0001                                       |
|                        |          | Emotion based                                            |           |          |                                                  |
|                        |          | 8 weeks                                                  | 2.01      | 1.78     | p = 0.07                                         |
|                        |          | 16 weeks                                                 | 1.9       | 1.57     | p = 0.002                                        |
|                        |          | 32 weeks                                                 | 1.65      | 1.36     | p = 0.0003                                       |
|                        |          | 44 weeks                                                 | 1.62      | 1.31     | p = 0.0001                                       |

|                                                        |                      |                                                 |        |        |                                                         |
|--------------------------------------------------------|----------------------|-------------------------------------------------|--------|--------|---------------------------------------------------------|
|                                                        |                      | Adding cereal to bottle                         |        |        |                                                         |
|                                                        |                      | 8 weeks                                         | 1.8%   | 5.30%  | CI (95% 0.6–15.6), p = 0.18                             |
|                                                        |                      | 20 weeks                                        | 20.00% | 8.40%  | CI (95% 0.2–0.8), p = 0.01                              |
|                                                        |                      | 32 weeks                                        | 14.00% | 10.20% | CI (95% 0.3–1.6), p = 0.38                              |
|                                                        |                      | Put child to bed with bottle/sippy cup          |        |        |                                                         |
|                                                        |                      | 8 weeks                                         | 2.8%   | 0%     | p = 0.95                                                |
|                                                        |                      | 20 weeks                                        | 2.80%  | 1.70%  | CI (95% 0.1–3.6), p = 0.56                              |
|                                                        |                      | 32 weeks                                        | 7.80%  | 5.30%  | CI (95% 0.2–1.9), p = 0.42                              |
|                                                        |                      | 52 weeks                                        | 20.50% | 10.40% | CI (95% 0.2–0.9), p = 0.03                              |
|                                                        |                      | Night time feeds (7 pm–7 am)                    |        |        |                                                         |
|                                                        |                      | 8 weeks                                         | 3.3    | 3.1    | p = 0.2                                                 |
|                                                        |                      | 20 weeks                                        | 2.2    | 1.8    | p = 0.32                                                |
|                                                        |                      | 32 weeks                                        | 1.7    | 1.3    | p = 0.01                                                |
| Starting Early Obesity Prevention Program, Gross, 2016 | N = 533<br>* N = 456 | Ever breastfed in the hospital                  | 95.3%  | 95.9%  | OR 1.16 (95% CI, 0.47 to 2.85), p = 0.82                |
|                                                        |                      | Exclusive BF in the hospital                    | 31.1%  | 37.1%  | OR 1.31 (95% CI, 0.89 to 1.93), p = 0.20                |
|                                                        |                      | Exclusive BF leaving the hospital               | 37.9%  | 45.7%  | OR 1.38 (95% CI, 0.95 to 2.01), p = 0.11                |
|                                                        |                      | Any BM at 3 months                              | 80.4%  | 83.3%  | OR 1.21 (95% CI, 0.75 to 1.95), p = 0.47                |
|                                                        |                      | Exclusive BM at 3 months                        | 23.4%  | 33.0%  | OR 1.61 (95% CI, 1.07 to 2.44), p = 0.03                |
|                                                        |                      | 100% BM on 24 h diet recall                     | 33%    | 42.7%  | OR 1.51 (95% CI, 1.03 to 2.21), p = 0.04                |
|                                                        |                      | Breastfeeding intensity continuous score (mean) | 59.7   | 67.7   | Mean difference –8.0 (95% CI, –15.3 to –0.75), p = 0.03 |
|                                                        |                      | Ever gave BM and formula at same feed per day   | 31.1%  | 22.4%  | OR 0.64 (95% CI, 0.36 to 1.15), p = 0.15                |

|                                                                 |                          |                                                                                   |       |       |                                                                |
|-----------------------------------------------------------------|--------------------------|-----------------------------------------------------------------------------------|-------|-------|----------------------------------------------------------------|
| Starting Early<br>Obesity Prevention<br>Program,<br>Gross, 2017 | N = 533<br><br>* N = 456 | Introduced tea, water,<br>juice or cereal in bottle at 3<br>months old            | 16.7% | 6.3%  | OR 0.34 (95% CI, 0.18 to<br>0.64), p = 0.001                   |
|                                                                 |                          | Total maternal infant<br>feeding knowledge                                        | 9.8   | 10.3  | Mean difference 0.51<br>(95% CI, 0.19 to 0.83), p<br>= 0.002   |
|                                                                 |                          | Tummy time (ever)                                                                 | 78.9% | 86.4% | OR 1.71 (95% CI, 1.04 to<br>2.8), p = 0.04                     |
|                                                                 |                          | Tummy time (daily)                                                                | 49.6% | 50.5% | OR 1.04 (95% CI, 0.72 to<br>1.5), p = 0.93                     |
|                                                                 |                          | Tummy time on the floor<br>(ever)                                                 | 24.1% | 40.7% | OR 2.16 (95% CI, 1.44 to<br>3.23), p < 0.001                   |
|                                                                 |                          | Tummy time mostly on<br>the floor                                                 | 5.2%  | 11.8% | OR 2.44 (95% CI, 1.2 to<br>4.98), p = 0.02                     |
|                                                                 |                          | Mean tummy time per day                                                           | 1.87  | 1.96  | Mean difference -0.09<br>(95% CI, -0.46 to -0.28),<br>p = 0.64 |
|                                                                 |                          | Mean infant age (weeks)<br>for starting tummy time<br>(SD)                        | 6.90  | 6.62  | Mean difference 0.28<br>(95% CI, -0.75 to 1.31),<br>p = 0.60   |
|                                                                 |                          | Unrestrained floor time<br>(ever)                                                 | 28.9% | 40.6% | OR 1.69 (95% CI, 1.14 to<br>2.49), p = 0.01                    |
|                                                                 |                          | Restricted time (ever)                                                            | 85.3% | 85.4% | OR 1.00 (95% CI, 0.60 to<br>1.69), p = 1.00                    |
| BLISS, Taylor, 2017                                             | N = 160                  | Restricted time (60 min or<br>more)                                               | 58.6% | 54.3% | OR 0.84 (95% CI, 0.58 to<br>1.22), p = 0.39                    |
|                                                                 |                          | Infant bouncy seat (ever)                                                         | 57.5% | 61.2% | OR 0.86 (95% CI, 0.59 to<br>1.25), p = 0.45                    |
|                                                                 |                          | Indoor baby swing (ever)                                                          | 20.7% | 20.4% | OR 0.98 (95% CI, 0.62 to<br>1.55), p = 1.00                    |
|                                                                 |                          | Car seat when not in a car<br>(ever)                                              | 16.4% | 9.5%  | OR 0.54 (95% CI, 0.30 to<br>0.95), p = 0.04                    |
|                                                                 |                          | Energy self-regulation<br>(mean SD of scale 1–5<br>based on parental<br>response) | 4.03  | 4.01  | Mean difference -0.04<br>(95% CI, -0.29 to 0.21)               |
| BLISS, Taylor, 2017                                             | N = 160                  | Satiety response (mean SD<br>of scale 1–5 based on<br>parental response)          | 3.23  | 3.01  | Mean difference -0.24<br>(95% CI, -0.41 to -0.07)              |
|                                                                 |                          | Food responsiveness<br>(mean SD of scale 1–5<br>based on parental<br>response)    | 2.41  | 2.51  | Mean difference 0.12<br>(-0.09 to 0.34)                        |

|                        |                                                                           |            |              |                                               |
|------------------------|---------------------------------------------------------------------------|------------|--------------|-----------------------------------------------|
| N = 113                | Food fussiness (mean SD of scale 1–5 based on parental response)          | 2.61       | 2.43         | Mean difference –0.18 (95% CI, –0.40 to 0.05) |
|                        | Child enjoyment of food (mean SD of scale 1–5 based on parental response) | 3.84       | 4.07         | Mean difference 0.24 (95% CI, 0.05 to 0.43)   |
|                        | Energy intake (per day), kj                                               | 4084       | 4026         | Mean difference 143 (CI 95%, –241 to 526)     |
| PRIMROSE, Doring, 2016 | Children's eating habits                                                  |            |              |                                               |
|                        | Fruits (t/d)                                                              | 1.1 (0.03) | 1.1(0.03)    | 0.01(–0.09 to 0.11), p = 0.78                 |
|                        | Children's eating habits                                                  |            |              |                                               |
|                        | Vegetables (t/d)                                                          | 0.9 (0.03) | 1.0 (0.03)   | 0.13 (0.04 to 0.22), p = 0.01                 |
|                        | Children's eating habits                                                  |            |              |                                               |
|                        | Fish (t/wk)                                                               | 1.5 (0.06) | 1.6 (0.06)   | 0.10 (–0.06 to 0.27), p = 0.21                |
|                        | Children's eating habits                                                  |            |              |                                               |
|                        | French fries (t/mo)                                                       | 1.8 (0.07) | 1.5 (0.07)   | –0.37 (–0.58 to –0.17), p < 0.001             |
|                        | Children's eating habits                                                  |            |              |                                               |
|                        | Sugared drinks (t/wk)                                                     | 2.7 (0.15) | 2.2 (0.18)   | –0.49 (–0.97 to –0.15), p = 0.04              |
|                        | Discretionary calories (t/wk)                                             | 5.9 (0.12) | 5.3 (0.17)   | –0.60 (–1.01 to –0.18), p= 0.01               |
|                        | Mothers' eating habits                                                    |            |              |                                               |
|                        | —Fruits (t/d)                                                             | 1.1 (0.04) | 1.2 (0.03)   | 0.07 (–0.04 to 0.18), p = 0.22                |
|                        | Mothers' eating habits                                                    |            |              |                                               |
|                        | —Vegetables (t/d)                                                         | 1.3 (0.04) | 1.3 (0.06)   | 0.10 (–0.02 to 0.21), p = 0.10                |
|                        | Mothers' eating habits                                                    |            |              |                                               |
|                        | —Fish (t/wk)                                                              | 1.8 (0.07) | 2.0 (0.07)   | 0.18 (–0.01 to 0.38), p = 0.07                |
|                        | Mothers' eating habits                                                    |            |              |                                               |
|                        | —French fries (t/mo)                                                      | 1.7 (0.10) | 1.4 (0.08)   | –0.33 (–0.58 to –0.10), p = 0.01              |
|                        | Mothers' eating habits                                                    |            |              |                                               |
|                        | Sugared drinks (t/wk)                                                     | 1.8 (0.11) | 1.5 (0.14)   | –0.26 (–0.60 to 0.08), p = 0.13               |
|                        | Mothers' eating habits                                                    |            |              |                                               |
|                        | Discretionary calories (t/wk)                                             | 5.9(0.12)  | 5.3(0.17)    | –1.00 (–1.72 to –0.28), p = 0.01              |
|                        | Children's physical activity                                              | 51 min/day | 50.6 min/day | –0.36 (–3.00 to 2.28), p = 0.81               |

|                                           |         |                                                             |            |            |                                   |
|-------------------------------------------|---------|-------------------------------------------------------------|------------|------------|-----------------------------------|
|                                           |         | Mothers' physical activity                                  | 2.6 (0.04) | 2.6 (0.03) | 0.07 (−0.02 to 0.16), p = 0.13    |
| Early Obesity Prevention, Schroeder, 2015 | N = 232 | Tricep skinfold at baseline                                 | 7.85       | 7.94       | Mean difference 0.09              |
|                                           |         | Tricep skinfold at 12 months                                | 8.82       | 9.70       | Mean difference 0.88<br>p < 0.002 |
|                                           |         | Triceps skinfold at 24 months                               | 8.42       | 8.83       | Mean difference 0.41              |
|                                           |         | Triceps + subscapular skinfold at baseline                  | 14.45      | 14.36      | Mean difference −0.09             |
|                                           |         | Triceps + subscapular skinfold at 12 months                 | 15.36      | 16.46      | Mean difference 1.1 p < 0.018     |
|                                           |         | Triceps + subscapular skinfold at 24 months                 | 14.06      | 14.68      | Mean difference 0.62              |
|                                           |         | Use infant cereal as first complimentary food               | -          | -          | p < 0.001 (INT less likely)       |
|                                           |         | Use stage 1 vegetables as first complimentary food          | -          | -          | p < 0.05 (INT less likely)        |
|                                           |         | Offered soda                                                | 9%         | 1%         | p < 0.006                         |
|                                           |         | Sweetened tea                                               | 8.2%       | 1%         | p < 0.01                          |
|                                           |         | Punch                                                       | 5.8%       | 0%         | p < 0.02                          |
|                                           |         | Cow's milk                                                  | 16.2%      | 2.5%       | p < 0.001                         |
|                                           |         | Delay introduction of drink and food other than breast milk | -          | -          | p < 0.05 (INT more likely)        |
|                                           | N = 186 | Perceived feeding responsibility at 24 months               | 4.45       | 4.50       | Mean difference 0.05, p = 0.930   |
| PROBIT, Morandi, 2019                     |         | Perceived parent overweight at 24 months                    | 3.28       | 3.15       | Mean difference −0.13, p = 0.409  |
|                                           |         | Perceived child overweight at 24 months                     | 2.89       | 2.98       | Mean difference 0.09, p = 0.194   |
|                                           |         | Concerns about child overweight at 24 months                | 2.06       | 2.29       | Mean difference 0.23, p = 0.329   |
|                                           |         | Dietary restriction at 24 months                            | 3.44       | 3.77       | Mean difference 0.33, p = 0.010   |
|                                           |         | Pressure to eat at 24 months                                | 2.68       | 2.72       | Mean difference 0.04, p = 0.939   |
|                                           |         | Monitoring at 24 months                                     | 4.13       | 4.41       | Mean difference 0.28, p = 0.046   |
|                                           | N = 550 | Feeding on demand at 12 months (%)                          | 80%        | 93%        | 13% difference, p = 0.001         |



|         |                                                        |     |     |                         |
|---------|--------------------------------------------------------|-----|-----|-------------------------|
| N = 468 | Television viewing at age 2 years (>30 mins a day, %)  | 67% | 73% | 6% difference, p = 0.08 |
| N = 468 | Sweetened Beverage consumption at age 2 years (any, %) | 57% | 63% | 6% difference, p = 0.16 |

**Table S8.** Risk of Bias (RoB 2.0) assessments.

| Study                             | Design | Risk of bias  |
|-----------------------------------|--------|---------------|
| Healthy Beginnings @ 2 years      | RCT    | High Risk     |
| Healthy Beginnings @ 3.5, 5 years | RCT    | High Risk     |
| Feeding Young Children Study      | RCT    | Some Concerns |
| INFANT                            | RCT    | Low Risk      |
| INFANT at 3 and 5                 | RCT    | Low Risk      |
| NOURISH at 2 years                | RCT    | Low Risk      |
| NOURISH at 5 years                | RCT    | Low Risk      |
| PRIMROSE                          | RCT    | High Risk     |
| INSIGHT at 1 year                 | RCT    | Low Risk      |
| INSIGHT at 3 years                | RCT    | Low Risk      |
| BeeBOFT                           | RCT    | Low Risk      |
| BLISS                             | RCT    | Low Risk      |
| POI.nz                            | RCT    | Low Risk      |
| PROBIT                            | RCT    | Low Risk      |
| Early Obesity Prevention          | RCT    | High Risk     |

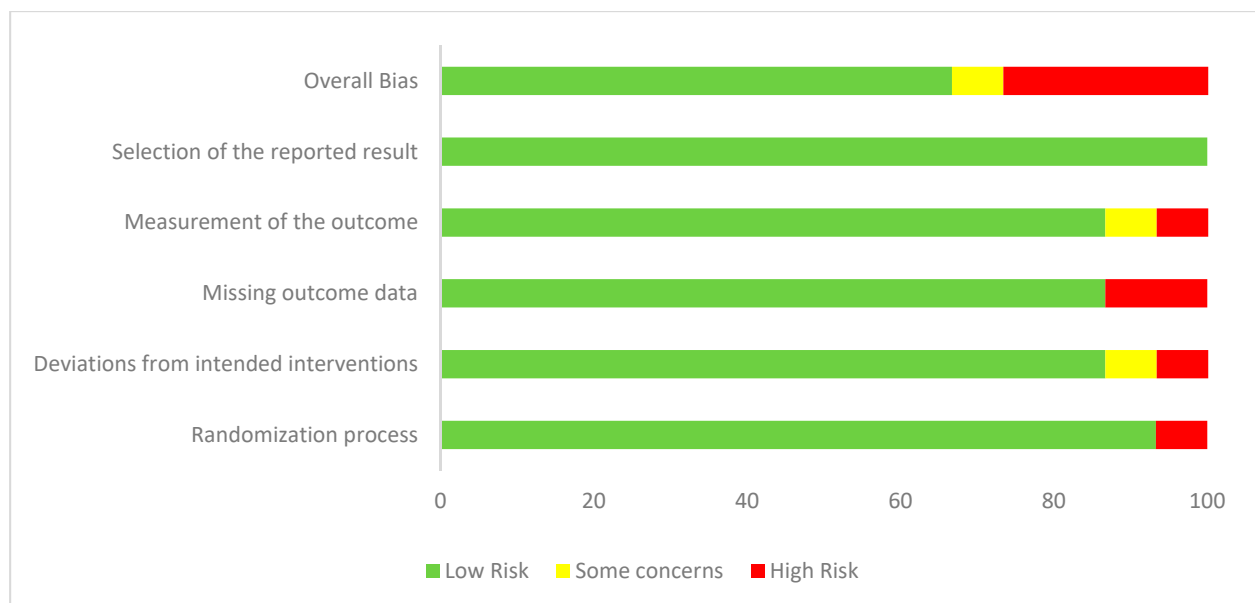

**Figure S1.** Risk of bias graph.
